# Supplementary material
Source: HighWire-hosted journal article supplement (https://bmjopengastro.bmj.com/content/7/1/e000497)

Figure 3 Procedural observations

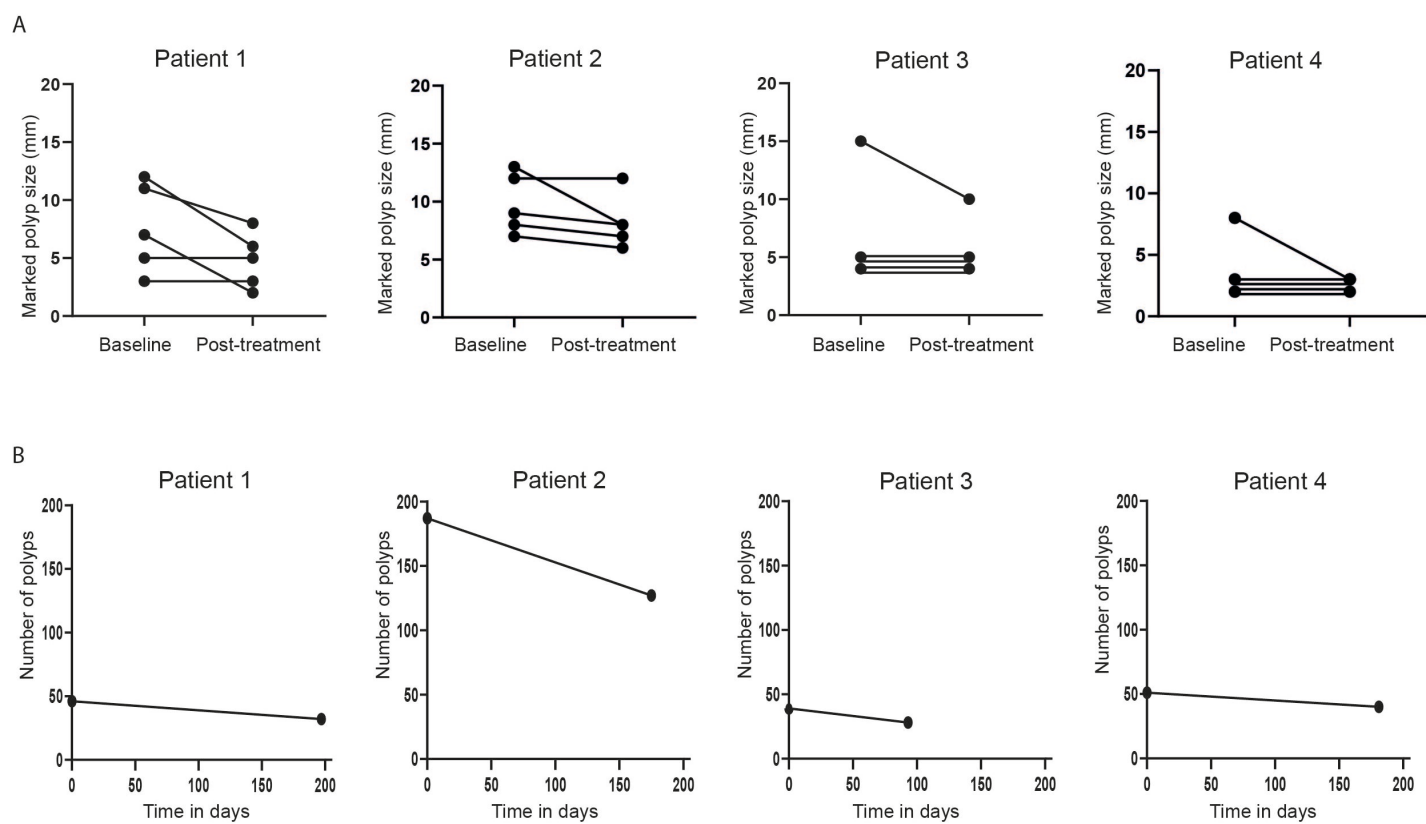

Supplement: inline-supplementary-material-4 [file inline-supplementary-material-4.pdf]
