# Supplementary material
Source: HighWire-hosted journal article supplement (https://bmjopengastro.bmj.com/content/7/1/e000497)

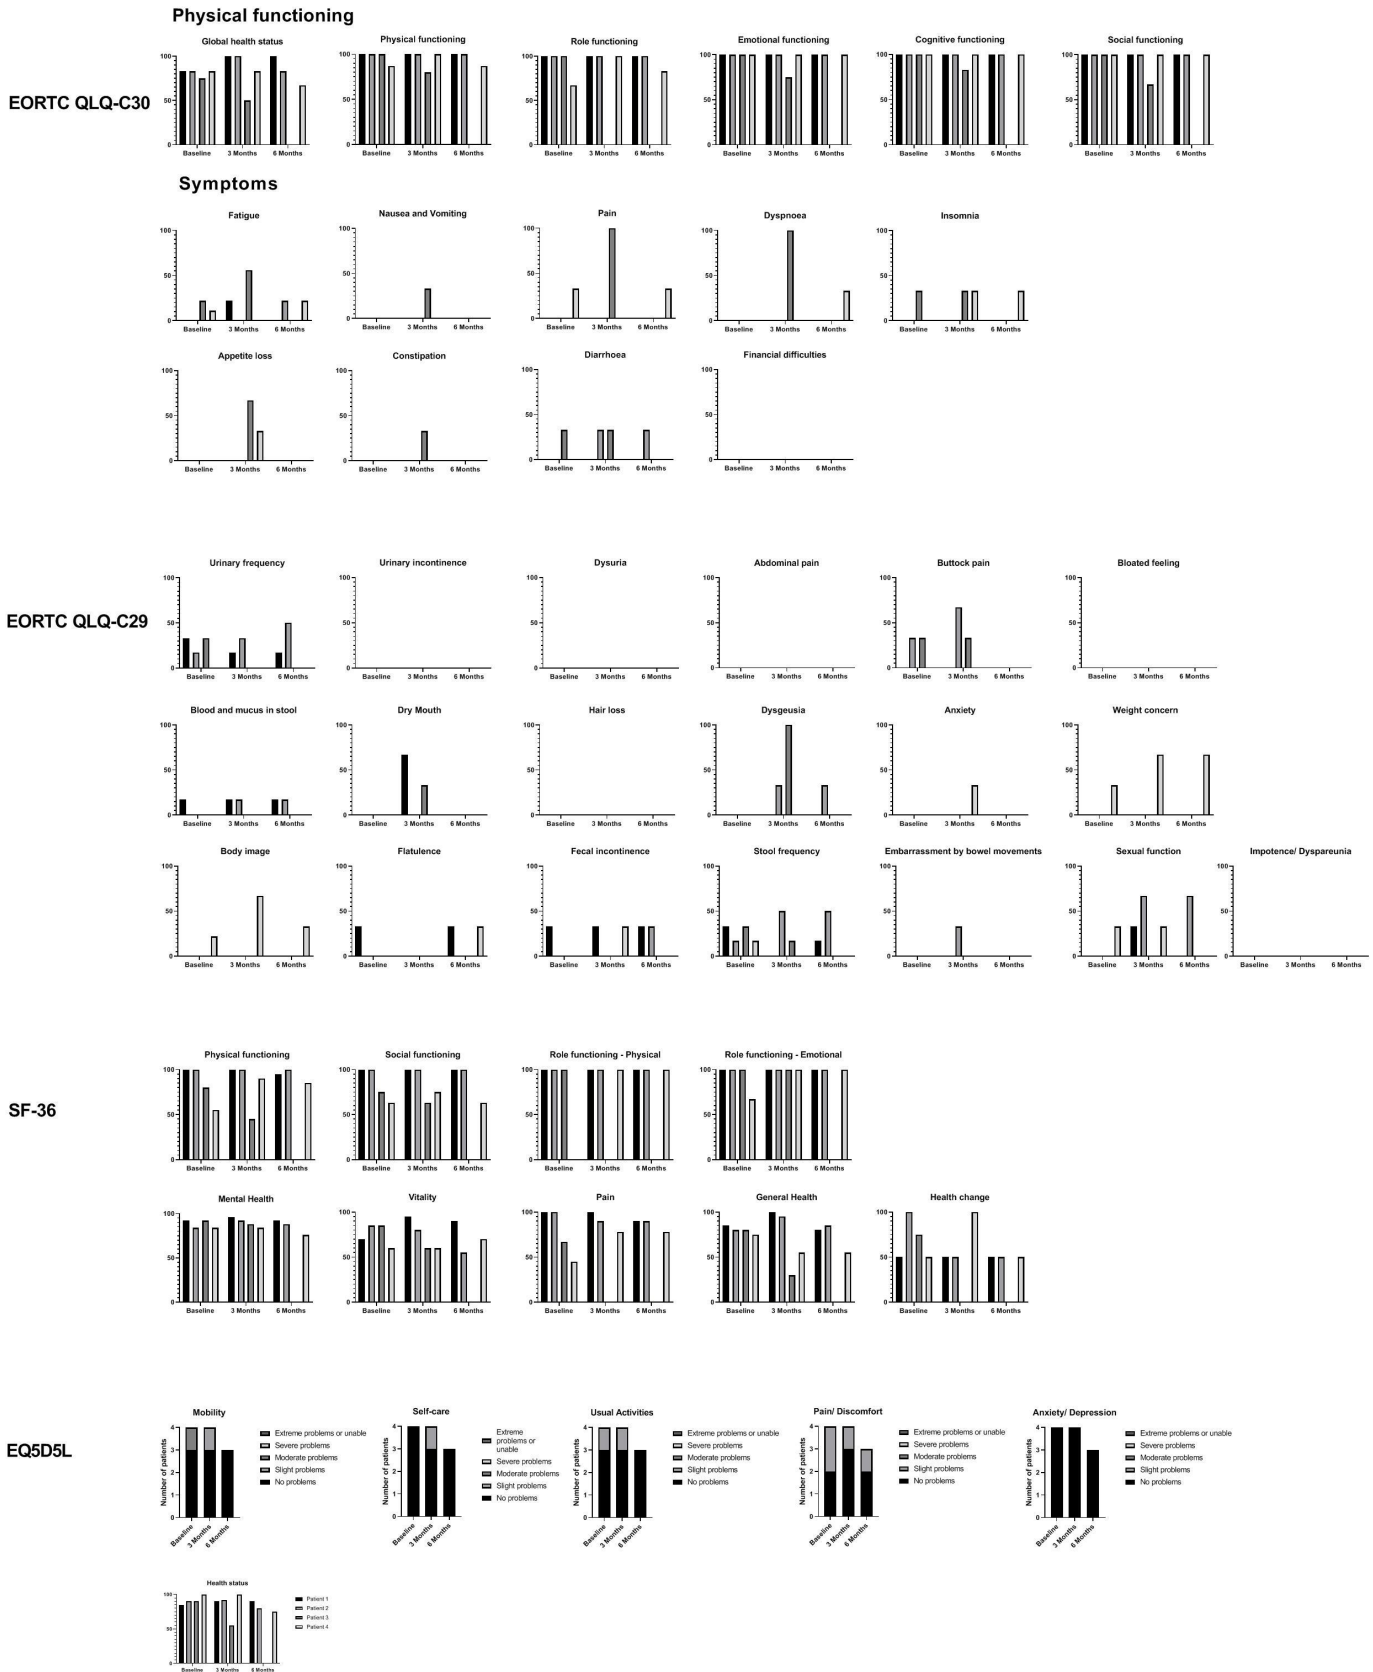

Supplement: inline-supplementary-material-5 [file inline-supplementary-material-5.pdf]
